# Supplementary material
Source: Springer Nature journal article supplement (https://www.springermedizin.de/resource/supplementary/12885_2012_3773_MOESM2_ESM.pdf/9464410)

**A**

Total Expression

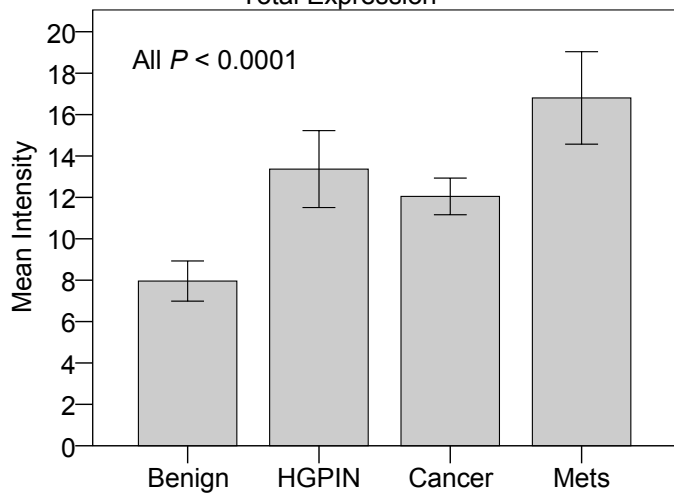**B**

Nuclear Expression

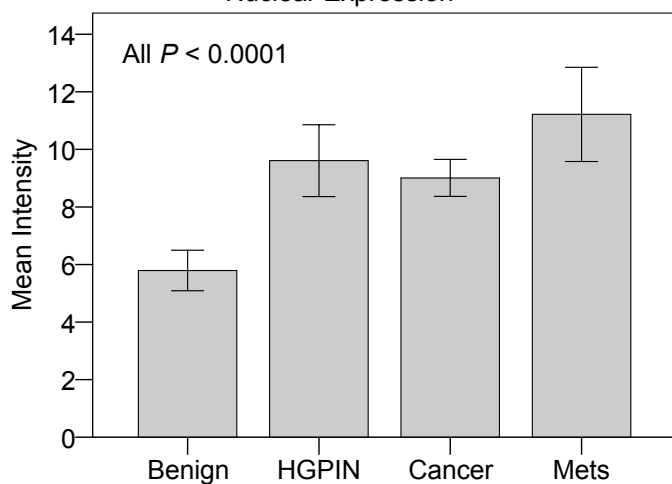**C**

Cytoplasmic Expression

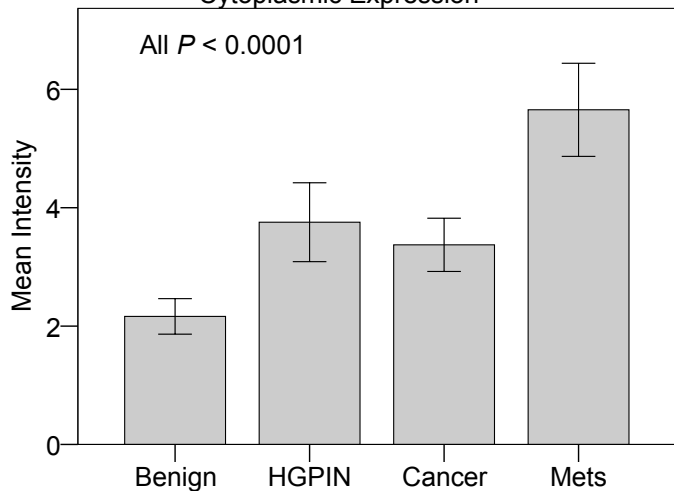**D**

Benign versus PCa

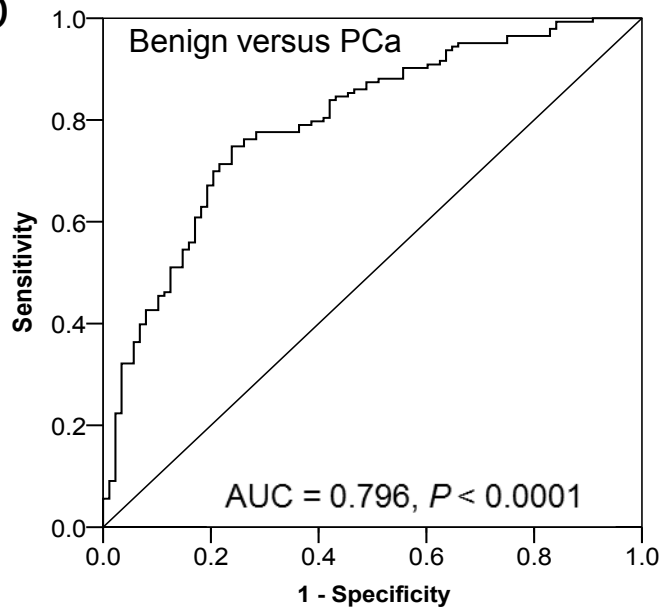

Supplement: MOESM2 [file 9464410]
